# Supplementary material for: RNA-Seq Gene Profiling - A Systematic Empirical Comparison
Source: PubMed Central journal article supplement (PMC4182317; doi:10.1371/journal.pone.0107026), 2014-09-30
Supplement: pone.0107026.s001.pdf [file pone.0107026.s001.pdf]

RNA-seq gene profiling - a systematic  
comparison

Supplementary material

Nuno A. Fonseca      John C. Marioni

Alvis Brazma

European Molecular Biology Laboratory

European Bioinformatics Institute (EMBL-EBI)

Wellcome Trust Genome Campus

Hinxton, Cambridge CB10 1SD

United Kingdom

August 29, 2014

## List of Tables

|    |                                                                                           |    |
|----|-------------------------------------------------------------------------------------------|----|
| S1 | Main parameters . . . . .                                                                 | 4  |
| S2 | Mappers: support for splicing . . . . .                                                   | 4  |
| S3 | Experimental data sets. . . . .                                                           | 4  |
| S4 | Synthetic data sets . . . . .                                                             | 5  |
| S5 | Average rankings of the pipelines across the data sets with<br>single-end reads. . . . .  | 12 |
| S6 | Average rankings of the pipelines across the data sets with<br>paired-end reads . . . . . | 13 |
| S7 | List of genes with consistent high error. . . . .                                         | 18 |
| S8 | GO terms of the genes with consistent high error (1/2). . . . .                           | 19 |
| S9 | GO terms of the genes with consistent high error (2/2). . . . .                           | 20 |

## List of Figures

|    |                                                                                                                                        |    |
|----|----------------------------------------------------------------------------------------------------------------------------------------|----|
| S1 | Experimental RNA-seq data from Human - SRP000225 . . . . .                                                                             | 6  |
| S2 | Experimental RNA-seq data from mouse - E-MTAB-599 . . . . .                                                                            | 7  |
| S3 | Experimental RNA-seq data from E. coli K12 - E-MTAB-387. . . . .                                                                       | 8  |
| S4 | Distribution of the error across all data sets and pipelines seg-<br>mented by pipelines using spliced and unspliced aligners. . . . . | 9  |
| S5 | Number of genes with high error (> 100%) or low error (< 10%)                                                                          | 10 |
| S6 | Number of results gathered by pipeline, read length and li-<br>brary tag type (SE=single end, PE=Paired-end). . . . .                  | 11 |

|     |                                                                                                                                                  |    |
|-----|--------------------------------------------------------------------------------------------------------------------------------------------------|----|
| S7  | Error by number of reads (normalized per gene using the sum of the transcript lengths of the gene and sequencing depth of the data set). . . . . | 14 |
| S8  | Percentage of the gene length “explained” by exons with a length shorter than 200 nucleotides. . . . .                                           | 15 |
| S9  | Gene sequence uniqueness: $\frac{1}{N}$ , where $N$ is the number of locations in the genome similar to the gene’s sequence. . . . .             | 16 |
| S10 | Number of genes with a positive or negative error across all data sets and pipelines. . . . .                                                    | 17 |

| Tool           | Version              | Main Parameters                                                         |
|----------------|----------------------|-------------------------------------------------------------------------|
| BWA1           | 0.6.2                |                                                                         |
| BWA2           | 0.6.2                |                                                                         |
| Bowtie1        | 0.12.9               | -fullref -sam -q -best -strata -k 10                                    |
| Bowtie2        | 2.0.5                | -end-to-end -k 10                                                       |
| Cufflinks1     | 1.3.0                | -min-isoform-fraction 0.05 -multi-read-correct -G                       |
| Cufflinks2     | 2.0.0                | -min-isoform-fraction 0.05 -multi-read-correct -G                       |
| Flux-Capacitor | 1.2.3-20121215021902 |                                                                         |
| GSNAP          | 2012-07-20           | -N 1 -A sam                                                             |
| HTSeq          | 0.5.3p9              | htseq-count -i gene_id -mode=(union—intersection-nonempty) -stranded=no |
| OSA            | 2.0.1                | -alignrna SearchNovelExonJunction=True                                  |
| Smalt          | 0.6.4                | -f samsoft                                                              |
| Star           | 2.2.0                | -outFilterMultimapNmax 10 -sjdbOverhang 20 -sjdbFileChrStartEnd         |
| TopHat1        | 1.4.1                | -min-intron-length 6                                                    |
| TopHat2        | 2.0.6                | -no-coverage-search -min-intron-length 6                                |

Table S1: Aligners and quantification methods: versions and parameters used.

| Mapper   | Splicing |
|----------|----------|
| BWA1     | No       |
| BWA2     | No       |
| Bowtie1  | No       |
| Bowtie2  | No       |
| GSNAP    | Yes      |
| OSA      | Yes      |
| Smalt    | No       |
| Star     | Yes      |
| TopHat 1 | Yes      |
| TopHat 2 | Yes      |

Table S2: Mappers: support for splicing

| Dataset    | Species    | Data                   | FASTQ | SE | PE | RL      |
|------------|------------|------------------------|-------|----|----|---------|
| E-MTAB-513 | Human      | 16 organism parts      | 32    | 16 | 16 | 75 & 50 |
| SRP000225  | Human      | 2 organism parts       | 6     | 6  | 0  | 36      |
| E-MTAB-599 | Mouse      | organism part (6)      | 36    | 36 | 0  | 76      |
| E-MTAB-387 | E.coli K12 | 2 developmental stages | 2     | 2  | 0  | 36      |

Table S3: Experimental data sets.

| Dataset      | SE/PE | RL  | Depth |
|--------------|-------|-----|-------|
| l50.d10.se   | SE    | 50  | 10    |
| l100.d10.se  | SE    | 100 | 10    |
| l150.d10.se  | SE    | 150 | 10    |
| l200.d10.se  | SE    | 200 | 10    |
| l50.d10.pe   | PE    | 50  | 10    |
| l100.d10.pe  | PE    | 100 | 10    |
| l150.d10.pe  | PE    | 150 | 10    |
| l200.d10.pe  | PE    | 200 | 10    |
| l50.d30.se   | SE    | 50  | 30    |
| l100.d30.se  | SE    | 100 | 30    |
| l150.d30.se  | SE    | 150 | 30    |
| l200.d30.se  | SE    | 200 | 30    |
| l50.d30.pe   | PE    | 50  | 30    |
| l100.d30.pe  | PE    | 100 | 30    |
| l150.d30.pe  | PE    | 150 | 30    |
| l200.d30.pe  | PE    | 200 | 30    |
| l50.d60.se   | SE    | 50  | 60    |
| l100.d60.se  | SE    | 100 | 60    |
| l150.d60.se  | SE    | 150 | 60    |
| l200.d60.se  | SE    | 200 | 60    |
| l50.d60.pe   | PE    | 50  | 60    |
| l100.d60.pe  | PE    | 100 | 60    |
| l150.d60.pe  | PE    | 150 | 60    |
| l200.d60.pe  | PE    | 200 | 60    |
| l50.d120.se  | SE    | 50  | 120   |
| l100.d120.se | SE    | 100 | 120   |
| l150.d120.se | SE    | 150 | 120   |
| l200.d120.se | SE    | 200 | 120   |
| l50.d120.pe  | PE    | 50  | 120   |
| l100.d120.pe | PE    | 100 | 120   |
| l150.d120.pe | PE    | 150 | 120   |
| l200.d120.pe | PE    | 200 | 120   |

Table S4: Synthetic data sets. Each simulated data set is composed by 8 fastq files for which the true number of raw counts per gene is known. The SE/PE column indicates if the pairing of the reads (SE-single end, PE- paired-end), the RL column indicates the read length and Depth the sequencing depth.

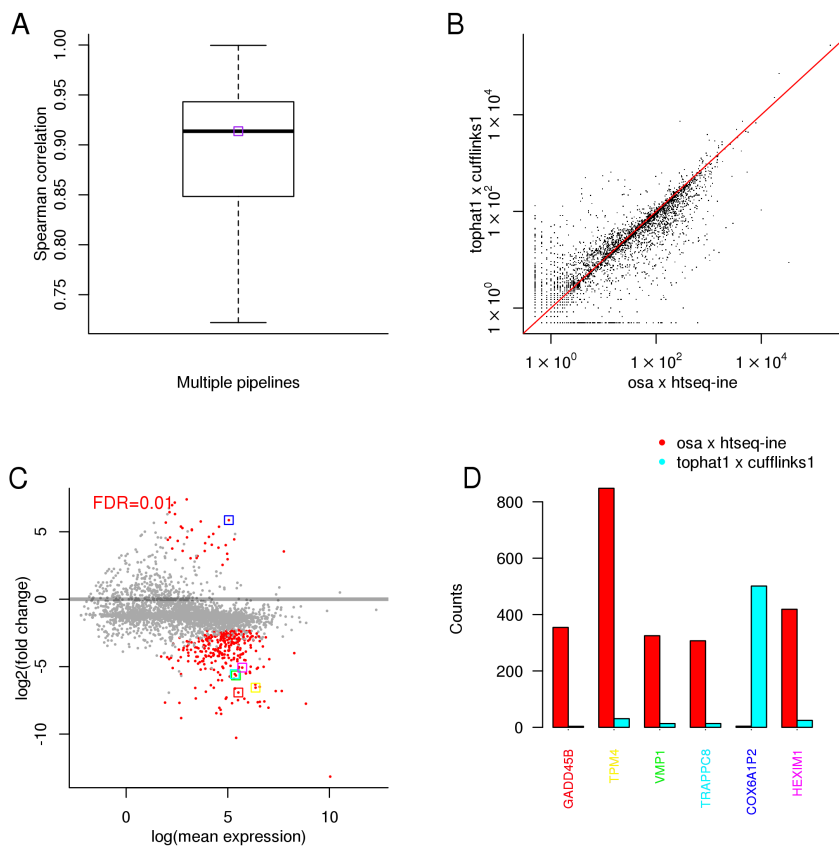

Figure S1: Experimental RNA-seq data from Human - SRP000225. A) Spearman correlation distribution between the gene expression profiles inferred by different pipelines; B) correlation between two specific pipelines (the respective Spearman correlation is shown in plot A as a purple box); C) fold change between the gene expression values inferred by the same two pipelines - dots in red denote genes where the expression values are significantly different between the two selected pipelines (for a false discovery rate of 0.01); D) expression values inferred by the two pipelines for the six selected (boxed) genes in plot C).

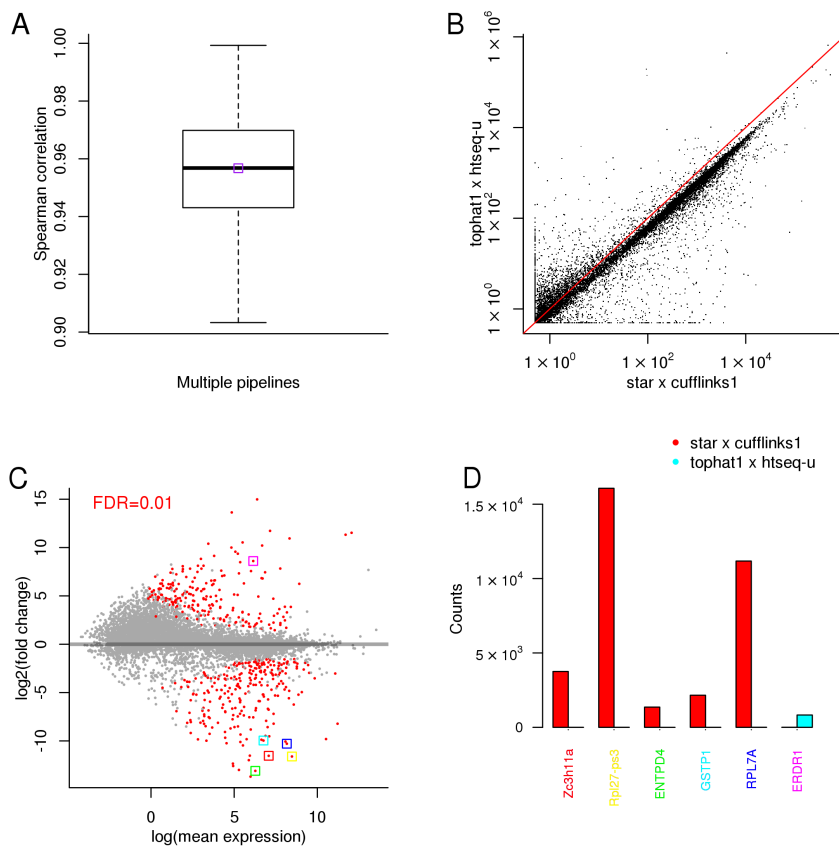

Figure S2: Experimental RNA-seq data from mouse - E-MTAB-599. A) Spearman correlation distribution between the gene expression profiles inferred by different pipelines; B) correlation between two specific pipelines (the respective Spearman correlation is shown in plot A as a purple box); C) fold change between the gene expression values inferred by the same two pipelines - dots in red denote genes where the expression values are significantly different between the two selected pipelines (for a false discovery rate of 0.01); D) expression values inferred by the two pipelines for the six selected (boxed) genes in plot C).

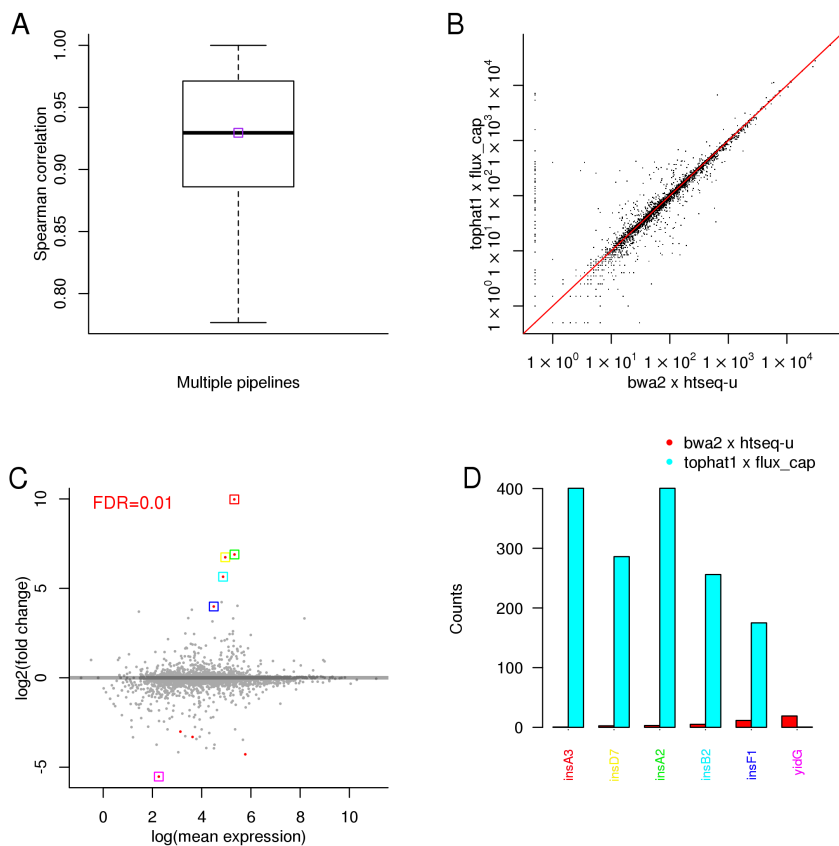

Figure S3: Experimental RNA-seq data from *E. coli* K12 - E-MTAB-387. A) Spearman correlation distribution between the gene expression profiles inferred by different pipelines; B) correlation between two specific pipelines (the respective Spearman correlation is shown in plot A as a purple box); C) fold change between the gene expression values inferred by the same two pipelines - dots in red denote genes where the expression values are significantly different between the two selected pipelines (for a false discovery rate of 0.01); D) expression values inferred by the two pipelines for the six selected (boxed) genes in plot C).



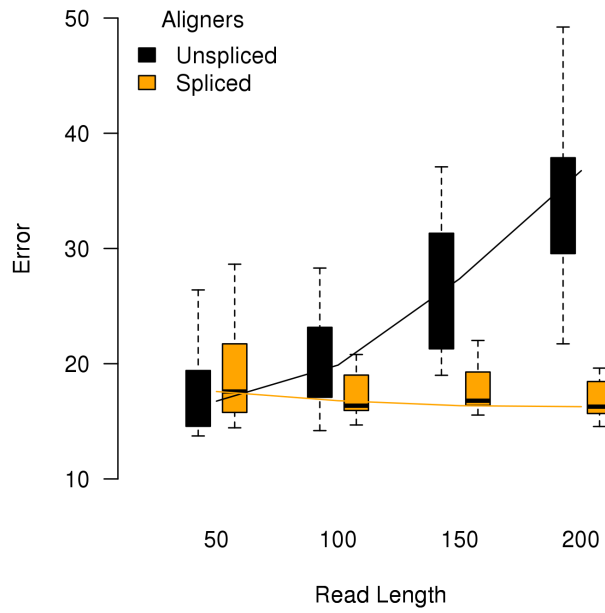

Figure S4: Distribution of the error across all data sets and pipelines segmented by pipelines using spliced and unspliced aligners.

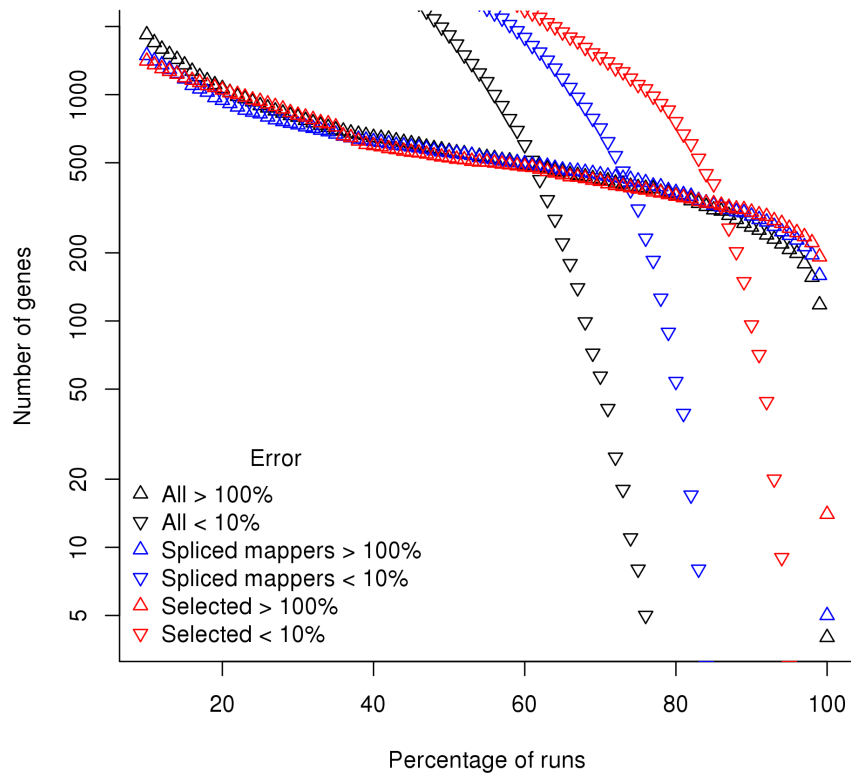

Figure S5: Number of genes with high error ( $> 100\%$ ) or low error ( $< 10\%$ ) across all data sets and: i) all pipelines; ii) pipelines with spliced aligners; iii) pipelines combining OSA or Tophat1 with htseq-ine, Cufflinks2, and Flux-capacitor.

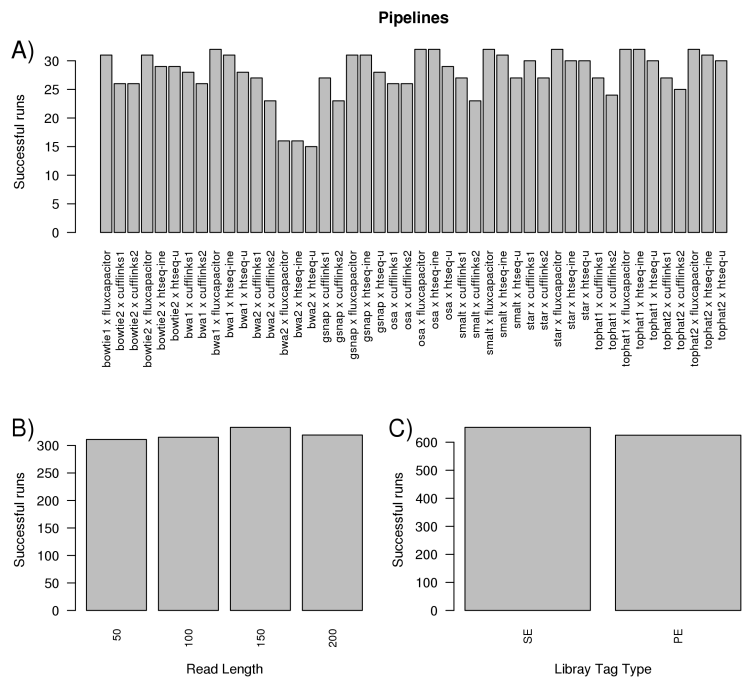

Figure S6: Number of results gathered by pipeline, read length and library tag type (SE=single end, PE=Paired-end).

| Aligner | Pipeline      |        | Overall Rank | Error Rank | Error mean $\pm$ sd | Spearman |                 |
|---------|---------------|--------|--------------|------------|---------------------|----------|-----------------|
|         | Quant.        | Method |              |            |                     | Rank     | mean $\pm$ sd   |
| osa     | htseq-ine     |        | 20           | 9          | 16.09 $\pm$ 0.68    | 11       | 0.93 $\pm$ 0.01 |
| tophat1 | htseq-ine     |        | 23           | 11         | 16.92 $\pm$ 2.58    | 13       | 0.93 $\pm$ 0.01 |
| smalt   | htseq-ine     |        | 24           | 15         | 18.35 $\pm$ 8.24    | 9        | 0.94 $\pm$ 0.00 |
| osa     | fluxcapacitor |        | 26           | 24         | 19.38 $\pm$ 0.87    | 2        | 0.95 $\pm$ 0.00 |
| tophat2 | htseq-ine     |        | 26           | 14         | 18.91 $\pm$ 6.8     | 12       | 0.93 $\pm$ 0.01 |
| star    | fluxcapacitor |        | 27           | 23         | 19.12 $\pm$ 0.9     | 4        | 0.94 $\pm$ 0.00 |
| star    | htseq-ine     |        | 27           | 10         | 16.84 $\pm$ 2.8     | 16       | 0.93 $\pm$ 0.01 |
| bwa2    | htseq-ine     |        | 28           | 16         | 20.34 $\pm$ 6.05    | 12       | 0.93 $\pm$ 0.02 |
| gsnap   | htseq-ine     |        | 31           | 15         | 22 $\pm$ 10.23      | 17       | 0.93 $\pm$ 0.01 |
| tophat1 | fluxcapacitor |        | 31           | 25         | 19.54 $\pm$ 0.92    | 5        | 0.94 $\pm$ 0.00 |
| tophat2 | fluxcapacitor |        | 33           | 27         | 19.98 $\pm$ 1.28    | 6        | 0.94 $\pm$ 0.01 |
| smalt   | htseq-u       |        | 35           | 21         | 20.98 $\pm$ 9.93    | 14       | 0.93 $\pm$ 0.00 |
| star    | cufflinks2    |        | 35           | 8          | 15.65 $\pm$ 0.83    | 27       | 0.91 $\pm$ 0.01 |
| tophat1 | cufflinks2    |        | 35           | 9          | 22.03 $\pm$ 20.29   | 25       | 0.91 $\pm$ 0.04 |
| bwa2    | fluxcapacitor |        | 36           | 26         | 20.84 $\pm$ 2.99    | 10       | 0.94 $\pm$ 0.01 |
| osa     | htseq-u       |        | 36           | 16         | 22.84 $\pm$ 19.12   | 21       | 0.92 $\pm$ 0.03 |
| bwa2    | htseq-u       |        | 37           | 20         | 23.75 $\pm$ 13.71   | 17       | 0.92 $\pm$ 0.02 |
| gsnap   | fluxcapacitor |        | 37           | 28         | 21.92 $\pm$ 8.47    | 10       | 0.94 $\pm$ 0.01 |
| gsnap   | htseq-u       |        | 38           | 15         | 21.18 $\pm$ 10.27   | 23       | 0.92 $\pm$ 0.01 |
| tophat1 | htseq-u       |        | 38           | 18         | 18.77 $\pm$ 4.73    | 20       | 0.92 $\pm$ 0.00 |
| star    | htseq-u       |        | 39           | 15         | 16.99 $\pm$ 2.58    | 23       | 0.92 $\pm$ 0.00 |
| tophat1 | cufflinks1    |        | 39           | 11         | 16.09 $\pm$ 0.83    | 29       | 0.91 $\pm$ 0.01 |
| tophat2 | htseq-u       |        | 39           | 19         | 20.66 $\pm$ 8.61    | 20       | 0.92 $\pm$ 0.01 |
| bwa2    | cufflinks2    |        | 41           | 21         | 21.92 $\pm$ 7.76    | 20       | 0.92 $\pm$ 0.02 |
| osa     | cufflinks2    |        | 41           | 14         | 20.51 $\pm$ 9.56    | 27       | 0.91 $\pm$ 0.03 |
| bwa1    | htseq-ine     |        | 44           | 23         | 24.58 $\pm$ 8.97    | 21       | 0.91 $\pm$ 0.03 |
| osa     | cufflinks1    |        | 44           | 15         | 18.31 $\pm$ 6.03    | 30       | 0.91 $\pm$ 0.01 |
| star    | cufflinks1    |        | 44           | 13         | 17.35 $\pm$ 4.49    | 31       | 0.91 $\pm$ 0.01 |
| tophat2 | cufflinks2    |        | 44           | 16         | 27.4 $\pm$ 25.32    | 29       | 0.88 $\pm$ 0.11 |
| gsnap   | cufflinks2    |        | 45           | 17         | 23.55 $\pm$ 16.98   | 27       | 0.9 $\pm$ 0.05  |
| smalt   | fluxcapacitor |        | 46           | 28         | 22.97 $\pm$ 7.7     | 18       | 0.93 $\pm$ 0.01 |
| bwa1    | htseq-u       |        | 49           | 25         | 25.64 $\pm$ 9.59    | 24       | 0.9 $\pm$ 0.03  |
| bwa1    | fluxcapacitor |        | 50           | 31         | 26.57 $\pm$ 8.65    | 20       | 0.91 $\pm$ 0.04 |
| gsnap   | cufflinks1    |        | 52           | 20         | 24.56 $\pm$ 15.57   | 32       | 0.91 $\pm$ 0.01 |
| smalt   | cufflinks2    |        | 52           | 27         | 28.88 $\pm$ 21.21   | 25       | 0.9 $\pm$ 0.06  |
| tophat2 | cufflinks1    |        | 52           | 20         | 27.16 $\pm$ 19.91   | 32       | 0.91 $\pm$ 0.01 |
| bwa1    | cufflinks2    |        | 54           | 26         | 33.52 $\pm$ 23.29   | 28       | 0.87 $\pm$ 0.09 |
| smalt   | cufflinks1    |        | 54           | 28         | 29.34 $\pm$ 21.16   | 26       | 0.9 $\pm$ 0.08  |
| bwa2    | cufflinks1    |        | 58           | 28         | 33.82 $\pm$ 22.89   | 30       | 0.86 $\pm$ 0.08 |
| bwa1    | cufflinks1    |        | 59           | 28         | 38.15 $\pm$ 29.03   | 31       | 0.85 $\pm$ 0.11 |
| bowtie2 | htseq-ine     |        | 61           | 26         | 23.11 $\pm$ 9.45    | 35       | 0.88 $\pm$ 0.01 |
| bowtie1 | fluxcapacitor |        | 64           | 34         | 28.07 $\pm$ 7.37    | 30       | 0.89 $\pm$ 0.04 |
| bowtie2 | htseq-u       |        | 66           | 30         | 25.96 $\pm$ 11.25   | 36       | 0.87 $\pm$ 0.01 |
| bowtie2 | fluxcapacitor |        | 72           | 35         | 30.24 $\pm$ 6.95    | 37       | 0.85 $\pm$ 0.04 |
| bowtie2 | cufflinks1    |        | 80           | 38         | 32.99 $\pm$ 12.91   | 43       | 0.81 $\pm$ 0.03 |
| bowtie2 | cufflinks2    |        | 80           | 39         | 39.63 $\pm$ 19.74   | 41       | 0.83 $\pm$ 0.03 |

Table S5: Average rankings of the pipelines across the data sets with single-end reads. The overall rank was obtained by summing the rankings on each metric. The average value and standard deviation accross datasets is also shown for each metric. The table is sorted by overall rank (top corresponds to lowest rank values).

| Aligner | Pipeline      |        | Overall Rank | Error Rank | Error mean $\pm$ sd | Spearman |                 |
|---------|---------------|--------|--------------|------------|---------------------|----------|-----------------|
|         | Quant.        | Method |              |            |                     | Rank     | mean $\pm$ sd   |
| tophat1 | htseq-ine     |        | 12           | 9          | 17.65 $\pm$ 2.5     | 3        | 0.94 $\pm$ 0.00 |
| gsnap   | htseq-ine     |        | 15           | 8          | 17.59 $\pm$ 2.61    | 7        | 0.94 $\pm$ 0.00 |
| osa     | htseq-ine     |        | 15           | 9          | 17.68 $\pm$ 2.55    | 6        | 0.94 $\pm$ 0.00 |
| tophat2 | htseq-ine     |        | 19           | 11         | 19.31 $\pm$ 5.07    | 8        | 0.94 $\pm$ 0.00 |
| star    | htseq-ine     |        | 21           | 11         | 17.99 $\pm$ 2.8     | 10       | 0.94 $\pm$ 0.00 |
| osa     | fluxcapacitor |        | 23           | 21         | 20.51 $\pm$ 2.67    | 2        | 0.95 $\pm$ 0.00 |
| tophat1 | fluxcapacitor |        | 23           | 20         | 20.04 $\pm$ 2.82    | 3        | 0.95 $\pm$ 0.00 |
| osa     | cufflinks2    |        | 27           | 12         | 21.14 $\pm$ 9.91    | 15       | 0.93 $\pm$ 0.01 |
| smalt   | htseq-ine     |        | 27           | 12         | 19.55 $\pm$ 6.19    | 14       | 0.93 $\pm$ 0.00 |
| tophat1 | cufflinks2    |        | 29           | 15         | 23.25 $\pm$ 13.86   | 14       | 0.93 $\pm$ 0.01 |
| star    | fluxcapacitor |        | 31           | 24         | 21.9 $\pm$ 3.22     | 7        | 0.94 $\pm$ 0.00 |
| gsnap   | cufflinks2    |        | 32           | 14         | 24.72 $\pm$ 18.34   | 18       | 0.92 $\pm$ 0.04 |
| osa     | cufflinks1    |        | 33           | 11         | 23.18 $\pm$ 15.1    | 22       | 0.92 $\pm$ 0.01 |
| star    | cufflinks2    |        | 33           | 15         | 18.15 $\pm$ 3.69    | 18       | 0.93 $\pm$ 0.01 |
| bwa1    | htseq-ine     |        | 34           | 19         | 23.05 $\pm$ 7.14    | 14       | 0.92 $\pm$ 0.02 |
| star    | cufflinks1    |        | 34           | 10         | 17.98 $\pm$ 4.16    | 24       | 0.92 $\pm$ 0.01 |
| tophat1 | cufflinks1    |        | 34           | 16         | 26.65 $\pm$ 19.29   | 18       | 0.92 $\pm$ 0.01 |
| tophat1 | htseq-u       |        | 34           | 17         | 21.06 $\pm$ 4.81    | 17       | 0.93 $\pm$ 0.00 |
| tophat2 | cufflinks2    |        | 35           | 13         | 20.65 $\pm$ 7.89    | 22       | 0.92 $\pm$ 0.01 |
| gsnap   | fluxcapacitor |        | 36           | 24         | 23.56 $\pm$ 3.21    | 12       | 0.93 $\pm$ 0.00 |
| osa     | htseq-u       |        | 36           | 16         | 21.13 $\pm$ 8.71    | 20       | 0.92 $\pm$ 0.00 |
| tophat2 | fluxcapacitor |        | 36           | 24         | 24.36 $\pm$ 5.37    | 11       | 0.93 $\pm$ 0.01 |
| gsnap   | cufflinks1    |        | 38           | 14         | 26.06 $\pm$ 18.71   | 24       | 0.9 $\pm$ 0.05  |
| smalt   | htseq-u       |        | 41           | 16         | 19.46 $\pm$ 3.48    | 25       | 0.92 $\pm$ 0.00 |
| bwa2    | cufflinks2    |        | 42           | 23         | 29.01 $\pm$ 19.91   | 19       | 0.91 $\pm$ 0.07 |
| gsnap   | htseq-u       |        | 42           | 18         | 26.48 $\pm$ 16.79   | 24       | 0.92 $\pm$ 0.01 |
| tophat2 | htseq-u       |        | 42           | 19         | 22.34 $\pm$ 6.28    | 22       | 0.92 $\pm$ 0.00 |
| star    | htseq-u       |        | 45           | 20         | 20.18 $\pm$ 5.97    | 25       | 0.92 $\pm$ 0.00 |
| tophat2 | cufflinks1    |        | 45           | 16         | 27.62 $\pm$ 23.49   | 29       | 0.89 $\pm$ 0.09 |
| bwa1    | htseq-u       |        | 47           | 27         | 26.72 $\pm$ 7.57    | 20       | 0.92 $\pm$ 0.02 |
| bwa2    | cufflinks1    |        | 47           | 24         | 34.07 $\pm$ 22.23   | 23       | 0.89 $\pm$ 0.08 |
| smalt   | cufflinks2    |        | 48           | 21         | 21.87 $\pm$ 7.75    | 27       | 0.91 $\pm$ 0.02 |
| smalt   | cufflinks1    |        | 50           | 21         | 23.94 $\pm$ 10.8    | 29       | 0.91 $\pm$ 0.02 |
| bwa1    | cufflinks2    |        | 51           | 27         | 29.56 $\pm$ 12.05   | 25       | 0.89 $\pm$ 0.05 |
| bwa1    | cufflinks1    |        | 52           | 26         | 34.92 $\pm$ 17.92   | 26       | 0.88 $\pm$ 0.05 |
| bwa1    | fluxcapacitor |        | 58           | 32         | 35.37 $\pm$ 11.82   | 26       | 0.88 $\pm$ 0.05 |
| smalt   | fluxcapacitor |        | 58           | 28         | 30.21 $\pm$ 8.77    | 30       | 0.89 $\pm$ 0.03 |
| bowtie2 | htseq-ine     |        | 67           | 32         | 37.74 $\pm$ 11.35   | 35       | 0.84 $\pm$ 0.04 |
| bowtie1 | fluxcapacitor |        | 69           | 35         | 39.95 $\pm$ 11.73   | 34       | 0.85 $\pm$ 0.03 |
| bowtie2 | htseq-u       |        | 71           | 34         | 41.58 $\pm$ 14.96   | 37       | 0.83 $\pm$ 0.04 |
| bowtie2 | cufflinks2    |        | 73           | 35         | 46.67 $\pm$ 22.7    | 38       | 0.8 $\pm$ 0.09  |
| bowtie2 | fluxcapacitor |        | 73           | 35         | 39.02 $\pm$ 7.66    | 38       | 0.81 $\pm$ 0.05 |
| bowtie2 | cufflinks1    |        | 74           | 35         | 45.36 $\pm$ 20.72   | 39       | 0.8 $\pm$ 0.06  |

Table S6: Average rankings of the pipelines across the data sets with paired-end reads. The overall rank was obtained by summing the rankings on each metric. The average value and standard deviation across datasets is shown for each metric between brackets. The table is sorted by overall rank (top corresponds to lowest rank values).

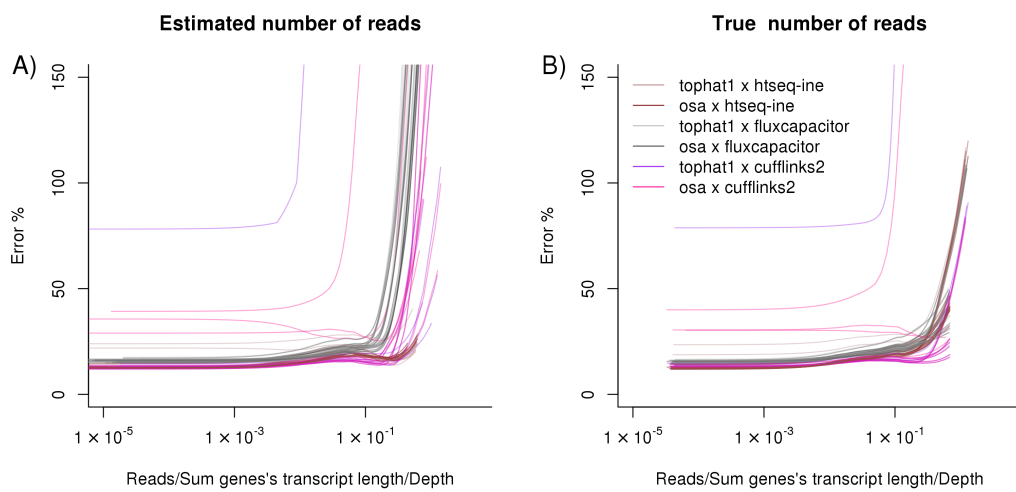

Figure S7: Error by number of reads (normalized per gene using the sum of the transcript lengths of a gene and and sequencing depth of the data set) for multiple pipelines and 16 data sets (single-end). The lines shown are lowest regressions of the errors per gene and data set. A - number of reads per gene used was inferred by the pipeline; B - the number of reads used corresponds to the true number of reads per gene.

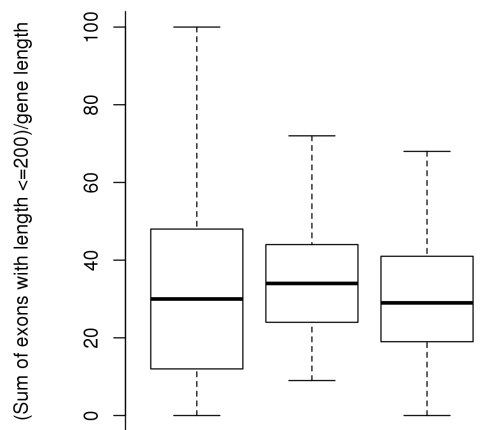

Figure S8: Percentage of the gene length “explained” by exons with a length shorter than 200 nucleotides.

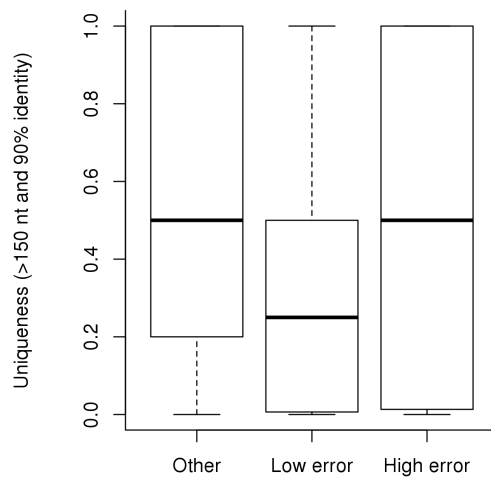

Figure S9: Gene sequence uniqueness:  $\frac{1}{N}$ , where  $N$  is the number of locations in the genome similar to the gene's sequence.



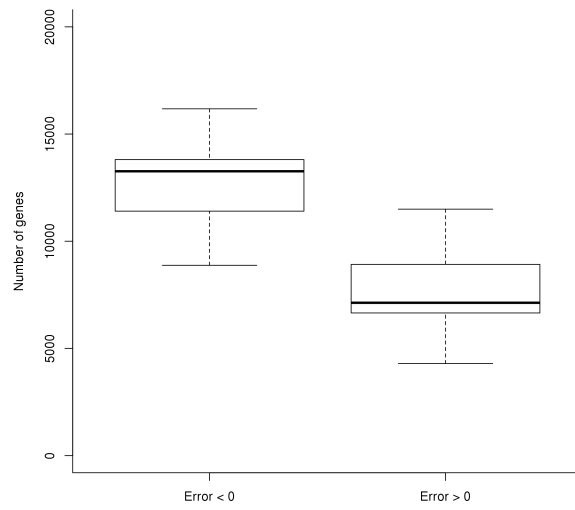

Figure S10: Number of genes with a positive or negative error across all data sets and pipelines.

| Ensembl ID      | Name                                                                                   | GC %  | Chr | N. Trans. | Length |
|-----------------|----------------------------------------------------------------------------------------|-------|-----|-----------|--------|
| ENSG00000166295 | ANAPC16 - anaphase promoting complex subunit 16                                        | 43.40 | 10  | 1         | 2814   |
| ENSG00000089006 | SNX5 - sorting nexin 5                                                                 | 42.13 | 20  | 11        | 4973   |
| ENSG00000101294 | HML3 - histocompatibility (minor) 13                                                   | 49.35 | 20  | 5         | 5928   |
| ENSG00000171863 | RPS7 - ribosomal protein S7                                                            | 44.76 | 2   | 4         | 5581   |
| ENSG00000163541 | SUCLG1 - succinate-CoA ligase, alpha subunit                                           | 39.25 | 2   | 5         | 4273   |
| ENSG00000177082 | WDR73 - WD repeat domain 73                                                            | 49.15 | 15  | 4         | 6135   |
| ENSG00000140553 | UNC45A - unc-45 homolog A (C. elegans)                                                 | 53.82 | 15  | 4         | 7930   |
| ENSG00000082068 | WDR70 - WD repeat domain 70                                                            | 39    | 5   | 2         | 7021   |
| ENSG00000197375 | SLC22A5 - solute carrier family 22 (organic cation/carnitine transporter), member 5    | 48.32 | 5   | 9         | 12778  |
| ENSG00000011485 | PPP5C - protein phosphatase 5, catalytic subunit                                       | 50.75 | 19  | 20        | 7015   |
| ENSG00000213930 | GALT - galactose-1-phosphate uridylyltransferase                                       | 50.16 | 9   | 9         | 4359   |
| ENSG00000213213 | KIAA1984 - KIAA1984                                                                    | 59.33 | 9   | 2         | 6065   |
| ENSG00000197070 | ARRDC1 - arrestin domain containing 1                                                  | 60.84 | 9   | 8         | 3816   |
| ENSG00000168676 | KCTD19 - potassium channel tetramerisation domain containing 19                        | 47.44 | 16  | 5         | 7366   |
| ENSG00000103187 | COTL1 - coactosin-like 1 (Dictyostelium)                                               | 50.24 | 16  | 2         | 8839   |
| ENSG00000122566 | HNRNPA2B1 - heterogeneous nuclear ribonucleoprotein A2/B1                              | 40.07 | 7   | 6         | 7532   |
| ENSG00000106258 | CYP3A5 - cytochrome P450, family 3, subfamily A, polypeptide 5                         | 40.47 | 7   | 5         | 6717   |
| ENSG00000105971 | CAV2 - caveolin 2                                                                      | 37.86 | 7   | 3         | 6633   |
| ENSG00000154438 | ASZ1 - ankyrin repeat, SAM and basic leucine zipper domain containing 1                | 35.27 | 7   | 11        | 3052   |
| ENSG00000196329 | GIMAP5 - GTPase, IMAP family member 5                                                  | 43.79 | 7   | 1         | 6026   |
| ENSG00000198912 | C1orf174 - chromosome 1 open reading frame 174                                         | 49.32 | 1   | 1         | 4384   |
| ENSG00000142920 | ADC - arginine decarboxylase                                                           | 45.93 | 1   | 20        | 6550   |
| ENSG00000116898 | MRPS15 - mitochondrial ribosomal protein S15                                           | 49.28 | 1   | 1         | 2908   |
| ENSG00000159214 | CCDC24 - coiled-coil domain containing 24                                              | 57.95 | 1   | 1         | 3548   |
| ENSG00000126088 | UROD - uroporphyrinogen decarboxylase                                                  | 52.29 | 1   | 3         | 2905   |
| ENSG00000117481 | NSUN4 - NOP2/Sun domain family, member 4                                               | 47.35 | 1   | 4         | 8461   |
| ENSG00000187889 | C1orf168 - chromosome 1 open reading frame 168                                         | 38.48 | 1   | 1         | 4611   |
| ENSG00000203965 | EFCAB7 - EF-hand calcium binding domain 7                                              | 35.15 | 1   | 1         | 5688   |
| ENSG00000125462 | C1orf61 - chromosome 1 open reading frame 61                                           | 51.53 | 1   | 5         | 8378   |
| ENSG00000127074 | RGS13 - regulator of G-protein signaling 13                                            | 35.75 | 1   | 2         | 5864   |
| ENSG00000159176 | CSRP1 - cysteine and glycine-rich protein 1                                            | 50.68 | 1   | 7         | 10311  |
| ENSG00000134548 | C12orf39 - chromosome 12 open reading frame 39                                         | 38.50 | 12  | 2         | 2925   |
| ENSG00000111786 | SRSF9 - serine/arginine-rich splicing factor 9                                         | 46.53 | 12  | 3         | 3740   |
| ENSG00000204348 | DOM3Z - dom-3 homolog Z (C. elegans)                                                   | 58.72 | 6   | 5         | 2482   |
| ENSG00000114857 | NKTR - natural killer-tumor recognition sequence                                       | 37.54 | 3   | 4         | 17336  |
| ENSG00000237765 | FAM200B - family with sequence similarity 200, member B                                | 40.86 | 4   | 3         | 4812   |
| ENSG00000157379 | DHRS1 - dehydrogenase/reductase (SDR family) member 1                                  | 48.04 | 14  | 6         | 4994   |
| ENSG00000054690 | PLEKHH1 - pleckstrin homology domain containing, family H (with MyTH4 domain) member 1 | 48.02 | 14  | 14        | 10788  |
| ENSG00000185189 | NRBP2 - nuclear receptor binding protein 2                                             | 62.45 | 8   | 6         | 4921   |
| ENSG00000133812 | SBF2 - SET binding factor 2                                                            | 38.31 | 11  | 18        | 16722  |
| ENSG00000109920 | FBNP4 - formin binding protein 4                                                       | 43.43 | 11  | 2         | 7581   |
| ENSG00000187066 | AP003068.6.1                                                                           | 55.56 | 11  | 3         | 4227   |
| ENSG00000149294 | NCAM1 - neural cell adhesion molecule 1                                                | 41.71 | 11  | 41        | 12734  |

Table S7: Genes with consistent high error (greater than 100%) across most pipelines and data sets: Ensembl gene ID; Gene name; percentage of GC-content; location (Chromosome); number of transcripts; gene length (sum of the length of the exons).

| Ensembl ID                         | GO term                                                                                                                                                                                                                                                                                                                                                                                                                                                                                                                                                                                                                                                                                                                                                                        |
|------------------------------------|--------------------------------------------------------------------------------------------------------------------------------------------------------------------------------------------------------------------------------------------------------------------------------------------------------------------------------------------------------------------------------------------------------------------------------------------------------------------------------------------------------------------------------------------------------------------------------------------------------------------------------------------------------------------------------------------------------------------------------------------------------------------------------|
| ENSG00000166295<br>ENSG00000089006 | protein ubiquitination;protein ubiquitination;mitosis;cell division;cytoplasm;anaphase-promoting complex pinocytosis;cell communication;protein transport;ruffle;phagocytic cup;cytoplasmic vesicle membrane;extrinsic to internal side of plasma membrane;extrinsic to endosome membrane;early endosome membrane;macropinocytic cup;phosphatidylinositol binding;phosphatidylinositol binding                                                                                                                                                                                                                                                                                                                                                                                 |
| ENSG00000101294                    | membrane protein proteolysis;plasma membrane;endoplasmic reticulum;rough endoplasmic reticulum;cell surface;integral to cytosolic side of endoplasmic reticulum membrane;integral to luminal side of endoplasmic reticulum membrane;protein binding;peptidase activity;aspartic endopeptidase activity, intramembrane cleaving;protein homodimerization activity                                                                                                                                                                                                                                                                                                                                                                                                               |
| ENSG00000171863                    | nuclear-transcribed mRNA catabolic process, nonsense-mediated decay;rRNA processing;translation;translation;translation;translational initiation;translational elongation;translational termination;SRP-dependent cotranslational protein targeting to membrane;viral reproduction;gene expression;RNA metabolic process;mRNA metabolic process;viral infectious cycle;viral transcription;ribosomal small subunit biogenesis;cellular protein metabolic process;cytosolic small ribosomal subunit;cytosolic small ribosomal subunit;ribonucleoprotein complex;cytosol;ribosome;nucleus;nucleolus;microtubule organizing center;90S preribosome;small-subunit processome;protein binding;RNA binding;structural constituent of ribosome                                        |
| ENSG00000163541                    | tricarboxylic acid cycle;tricarboxylic acid cycle;succinyl-CoA metabolic process;succinate metabolic process;small molecule metabolic process;plasma membrane;mitochondrion;cytoplasm;mitochondrial inner membrane;mitochondrial matrix;succinate-CoA ligase complex (GDP-forming);ATP citrate synthase activity;succinate-CoA ligase (ADP-forming) activity;succinate-CoA ligase (GDP-forming) activity;GTP binding;GDP binding;protein heterodimerization activity;cofactor binding                                                                                                                                                                                                                                                                                          |
| ENSG00000140553                    | muscle organ development;cell differentiation;chaperone-mediated protein folding;nucleus;perinuclear region of cytoplasm;Hsp90 protein binding                                                                                                                                                                                                                                                                                                                                                                                                                                                                                                                                                                                                                                 |
| ENSG00000197375                    | sodium ion transport;drug transmembrane transport;quaternary ammonium group transport;carnitine transport;carnitine transport;drug transport;quorum sensing involved in interaction with host;transmembrane transport;positive regulation of intestinal epithelial structure maintenance;sodium-dependent organic cation transport;plasma membrane;plasma membrane;integral to membrane;basolateral plasma membrane;apical plasma membrane;brush border membrane;brush border membrane;protein binding;ATP binding;carnitine transporter activity;carnitine transporter activity;drug transmembrane transporter activity;symporter activity;quaternary ammonium group transmembrane transporter activity;PDZ domain binding;antibiotic transporter activity                    |
| ENSG00000011485                    | signal transduction;transcription, DNA-dependent;protein dephosphorylation;mitosis;positive regulation of I-kappaB kinase/NF-kappaB cascade;response to morphine;cytosol;nucleus;cytoplasm;Golgi apparatus;neuron projection;neuronal cell body;protein binding;protein serine/threonine phosphatase activity;signal transducer activity;metal ion binding;identical protein binding                                                                                                                                                                                                                                                                                                                                                                                           |
| ENSG00000213930                    | carbohydrate metabolic process;galactose metabolic process;UDP-glucose catabolic process;galactose catabolic process;small molecule metabolic process;cytosol;Golgi apparatus;UDP-glucose:hexose-1-phosphate uridylyltransferase activity;zinc ion binding                                                                                                                                                                                                                                                                                                                                                                                                                                                                                                                     |
| ENSG00000168676                    | protein homooligomerization                                                                                                                                                                                                                                                                                                                                                                                                                                                                                                                                                                                                                                                                                                                                                    |
| ENSG00000103187                    | defense response to fungus;biological process;cellular component;cytoplasm;cytoskeleton;protein binding;actin binding;enzyme binding                                                                                                                                                                                                                                                                                                                                                                                                                                                                                                                                                                                                                                           |
| ENSG00000122566                    | nuclear mRNA splicing, via spliceosome;nuclear mRNA splicing, via spliceosome;mRNA processing;RNA splicing;gene expression;RNA transport;ribonucleoprotein complex;nucleus;cytoplasm;nucleoplasm;spliceosomal complex;nucleolus;heterogeneous nuclear ribonucleoprotein complex;catalytic step 2 spliceosome;nucleotide binding;protein binding;RNA binding;single-stranded telomeric DNA binding                                                                                                                                                                                                                                                                                                                                                                              |
| ENSG00000106258                    | xenobiotic metabolic process;steroid metabolic process;alkaloid catabolic process;drug catabolic process;small molecule metabolic process;oxidative demethylation;endoplasmic reticulum membrane;electron carrier activity;monooxygenase activity;oxidoreductase activity;oxygen binding;heme binding;aromatase activity                                                                                                                                                                                                                                                                                                                                                                                                                                                       |
| ENSG00000105971                    | negative regulation of endothelial cell proliferation;vesicle fusion;mitochondrion organization;endoplasmic reticulum organization;regulation of mitosis;synaptic transmission;vesicle organization;positive regulation of dopamine receptor signaling pathway;vesicle docking;skeletal muscle fiber development;protein oligomerization;caveola assembly;plasma membrane;Golgi membrane;intracellular;acrosomal membrane;cytosol;integral to plasma membrane;nucleus;Golgi apparatus;transport vesicle;lipid particle;caveola;cell surface;extrinsic to internal side of plasma membrane;protein complex;membrane raft;perinuclear region of cytoplasm;protein binding;syntaxin binding;D1 dopamine receptor binding;protein homodimerization activity;phosphoprotein binding |
| ENSG00000154438                    | signal transduction;male meiosis;multicellular organismal development;spermatogenesis;cell differentiation;gene silencing by RNA;piRNA metabolic process;DNA methylation involved in gamete generation;cytoplasm;pi-body;signal transducer activity                                                                                                                                                                                                                                                                                                                                                                                                                                                                                                                            |

Table S8: GO terms of the genes with consistent high error (greater than 100%) across most pipelines and data sets (part 1/2).

| Ensembl ID      | GO term                                                                                                                                                                                                                                                                                                                                                                                                                                                                                                                                                                                                                                                                                                                                                                                                                                                                                                                                                             |
|-----------------|---------------------------------------------------------------------------------------------------------------------------------------------------------------------------------------------------------------------------------------------------------------------------------------------------------------------------------------------------------------------------------------------------------------------------------------------------------------------------------------------------------------------------------------------------------------------------------------------------------------------------------------------------------------------------------------------------------------------------------------------------------------------------------------------------------------------------------------------------------------------------------------------------------------------------------------------------------------------|
| ENSG00000196329 | temperature homeostasis;positive regulation of natural killer cell cytokine production;positive regulation of humoral immune response mediated by circulating immunoglobulin;positive regulation of calcium ion transport into cytosol;T cell differentiation;negative regulation of interferon-gamma production;positive regulation of CD4-positive, CD25-positive, alpha-beta regulatory T cell differentiation;myeloid dendritic cell differentiation;T cell homeostasis;negative regulation of apoptotic process;negative regulation of nitric oxide biosynthetic process;positive regulation of gamma-delta T cell differentiation;positive regulation of membrane potential;positive regulation of natural killer cell mediated cytotoxicity;regulation of mitochondrial membrane permeability;negative regulation of T cell activation;negative regulation of lipid catabolic process;integral to membrane;lysosome;mitochondrial outer membrane;GTP binding |
| ENSG00000198912 | nucleus                                                                                                                                                                                                                                                                                                                                                                                                                                                                                                                                                                                                                                                                                                                                                                                                                                                                                                                                                             |
| ENSG00000142920 | ornithine metabolic process;polyamine metabolic process;polyamine biosynthetic process;spermatogenesis;cellular nitrogen compound metabolic process;small molecule metabolic process;agmatine biosynthetic process;mitochondrion;cytosol;arginine decarboxylase activity                                                                                                                                                                                                                                                                                                                                                                                                                                                                                                                                                                                                                                                                                            |
| ENSG00000116898 | translation;mitochondrion;mitochondrial small ribosomal subunit;nuclear membrane;structural constituent of ribosome                                                                                                                                                                                                                                                                                                                                                                                                                                                                                                                                                                                                                                                                                                                                                                                                                                                 |
| ENSG00000126088 | liver development;porphyrin-containing compound metabolic process;protoporphyrinogen IX biosynthetic process;heme biosynthetic process;heme biosynthetic process;response to iron ion;response to organic cyclic compound;response to amine stimulus;response to mercury ion;response to estradiol stimulus;small molecule metabolic process;response to ethanol;uroporphyrinogen III metabolic process;response to methylmercury;response to fungicide;cellular response to arsenic-containing substance;cytosol;nucleus;cytoplasm;microtubule cytoskeleton;uroporphyrinogen decarboxylase activity;uroporphyrinogen decarboxylase activity;ferrous iron binding                                                                                                                                                                                                                                                                                                   |
| ENSG00000117481 | mitochondrial large ribosomal subunit;methyltransferase activity                                                                                                                                                                                                                                                                                                                                                                                                                                                                                                                                                                                                                                                                                                                                                                                                                                                                                                    |
| ENSG00000203965 | calcium ion binding                                                                                                                                                                                                                                                                                                                                                                                                                                                                                                                                                                                                                                                                                                                                                                                                                                                                                                                                                 |
| ENSG00000125462 | nucleus                                                                                                                                                                                                                                                                                                                                                                                                                                                                                                                                                                                                                                                                                                                                                                                                                                                                                                                                                             |
| ENSG00000127074 | G-protein coupled receptor signaling pathway;termination of G-protein coupled receptor signaling pathway;positive regulation of GTPase activity;plasma membrane;cytosol;nucleus;cytoplasm;GTPase activator activity                                                                                                                                                                                                                                                                                                                                                                                                                                                                                                                                                                                                                                                                                                                                                 |
| ENSG00000159176 | nucleus;zinc ion binding                                                                                                                                                                                                                                                                                                                                                                                                                                                                                                                                                                                                                                                                                                                                                                                                                                                                                                                                            |
| ENSG00000134548 | extracellular region;nucleus;intracellular membrane-bounded organelle;transport vesicle                                                                                                                                                                                                                                                                                                                                                                                                                                                                                                                                                                                                                                                                                                                                                                                                                                                                             |
| ENSG00000111786 | nuclear mRNA splicing, via spliceosome;transcription from RNA polymerase II promoter;termination of RNA polymerase II transcription;mRNA splice site selection;mRNA processing;mRNA export from nucleus;RNA splicing;gene expression;mRNA 3-end processing;negative regulation of nuclear mRNA splicing, via spliceosome;nucleoplasm;nucleotide binding;RNA binding                                                                                                                                                                                                                                                                                                                                                                                                                                                                                                                                                                                                 |
| ENSG00000204348 | nucleotide binding;metal ion binding                                                                                                                                                                                                                                                                                                                                                                                                                                                                                                                                                                                                                                                                                                                                                                                                                                                                                                                                |
| ENSG00000114857 | protein folding;membrane;peptidyl-prolyl cis-trans isomerase activity;cyclosporin A binding                                                                                                                                                                                                                                                                                                                                                                                                                                                                                                                                                                                                                                                                                                                                                                                                                                                                         |
| ENSG00000237765 | nucleic acid binding                                                                                                                                                                                                                                                                                                                                                                                                                                                                                                                                                                                                                                                                                                                                                                                                                                                                                                                                                |
| ENSG00000157379 | endoplasmic reticulum;mitochondrial inner membrane;nucleotide binding;oxidoreductase activity                                                                                                                                                                                                                                                                                                                                                                                                                                                                                                                                                                                                                                                                                                                                                                                                                                                                       |
| ENSG00000054690 | cytoskeleton;phospholipid binding                                                                                                                                                                                                                                                                                                                                                                                                                                                                                                                                                                                                                                                                                                                                                                                                                                                                                                                                   |
| ENSG00000185189 | negative regulation of macroautophagy;neuron differentiation;negative regulation of neuron apoptotic process;cytoplasm                                                                                                                                                                                                                                                                                                                                                                                                                                                                                                                                                                                                                                                                                                                                                                                                                                              |
| ENSG00000133812 | myelination;protein tetramerization;membrane;vacuolar membrane;protein binding;phosphatase activity;phosphatase regulator activity;phosphatase binding;phosphatidylinositol binding;protein homodimerization activity                                                                                                                                                                                                                                                                                                                                                                                                                                                                                                                                                                                                                                                                                                                                               |
| ENSG00000149294 | cell adhesion;axon guidance;cytokine-mediated signaling pathway;homotypic cell-cell adhesion;positive regulation of calcium-mediated signaling;interferon-gamma-mediated signaling pathway;plasma membrane;Golgi membrane;integral to membrane;extracellular region;external side of plasma membrane;cell surface;anchored to membrane;axon;neuronal cell body                                                                                                                                                                                                                                                                                                                                                                                                                                                                                                                                                                                                      |

Table S9: GO terms for the genes with consistent high error (greater than 100%) across most pipelines and data sets (part 2/2).
